# Supplementary material for: Human Fibrinogen Inhibits Amyloid Assembly of Most Phenol-Soluble Modulins from Staphylococcus aureus
Source: PubMed Central journal article supplement — ACS Omega. 2021 Aug 16;6(34):21960–70. doi: 10.1021/acsomega.1c02333 (PMC8412925; doi:10.1021/acsomega.1c02333), 2021-08-16
Supplement: ao1c02333_si_001.pdf [file ao1c02333_si_001.pdf]

# Human Fibrinogen inhibits amyloid assembly of most Phenol Soluble Modulins (PSM) from *Staphylococcus aureus*

*Zahra Najarzadeh,<sup>†</sup> Janni Nielsen,<sup>†</sup> Azad Farzadfard,<sup>†</sup> Vita Sereikaite,<sup>‡</sup> Kristian Strømgaard,<sup>‡</sup> Rikke Louise Meyer,<sup>†</sup> and Daniel Erik Otzen <sup>†\*</sup>*

<sup>†</sup> Interdisciplinary Nanoscience Centre (iNANO), Aarhus University, Gustav Wieds Vej 14, 8000 Aarhus C, Denmark

<sup>‡</sup> Department of Drug Design and Pharmacology, University of Copenhagen, Universitetsparken 2, 2100 Copenhagen Ø, Denmark

\* To whom correspondence should be addressed at [dao@inano.au.dk](mailto:dao@inano.au.dk)

**KEYWORDS:** Phenol soluble modulin, bacterial amyloid, Fibrinogen, PSM peptides, Biofilm, *Staphylococcus aureus*.

## Supplementary Information

### TABLES

**Table S1.** Deconvolution results from FTIR of PSMs incubated with Fg

| Peptide              | [Fg] (mg/ml) | Peak position (cm <sup>-1</sup> ) | % $\beta$ -sheet content | % $\alpha$ -helix content |
|----------------------|--------------|-----------------------------------|--------------------------|---------------------------|
| PSM $\alpha$ 1       | 0            | 1628, 1655                        | 73.6                     | 26.4                      |
| PSM $\alpha$ 1       | 0.25         | 1625, 1651                        | 43.36                    | 56.6                      |
| PSM $\alpha$ 1       | 1            | 1621, 1650                        | 11                       | 89.0                      |
| PSM $\alpha$ 3 (+Fg) | 0-1          | 1685, 1653                        | 4.4                      | 95.6                      |
| PSM $\beta$ 1        | 0            | 1630, 1660                        | 71.1                     | 28.9*                     |
| PSM $\beta$ 1        | 0.25         | 1630, 1659                        | 63.6                     | 36.4*                     |
| PSM $\beta$ 1        | 0.5          | 1629, 1657                        | 68                       | 32*                       |
| PSM $\beta$ 2        | 0            | 1626, 1660                        | 71.2                     | 28.8*                     |
| PSM $\beta$ 2        | 0.25         | 1621, 1650                        | 8                        | 92                        |
| PSM $\beta$ 2        | 1            | 1619, 1650                        | 2                        | 98                        |

Notes:

\* Peak position at 1660 cm<sup>-1</sup> mainly matches to  $\beta$ -turn

**Table S2:** *p*-values of multiple regression analysis of the correlation between signal intensity of alanine scans from peptide arrays and the two parameters charge and hydrophobicity

| Peptide        | Charge               | Hydrophobicity       |
|----------------|----------------------|----------------------|
| PSM $\alpha$ 1 | $8.4 \times 10^{-5}$ | 0.008                |
| PSM $\alpha$ 3 | $2.9 \times 10^{-5}$ | $5.7 \times 10^{-5}$ |
| PSM $\beta$ 1  | $1.6 \times 10^{-7}$ | 0.1                  |
| PSM $\beta$ 2  | $1.6 \times 10^{-7}$ | 0.1                  |

FIGURES

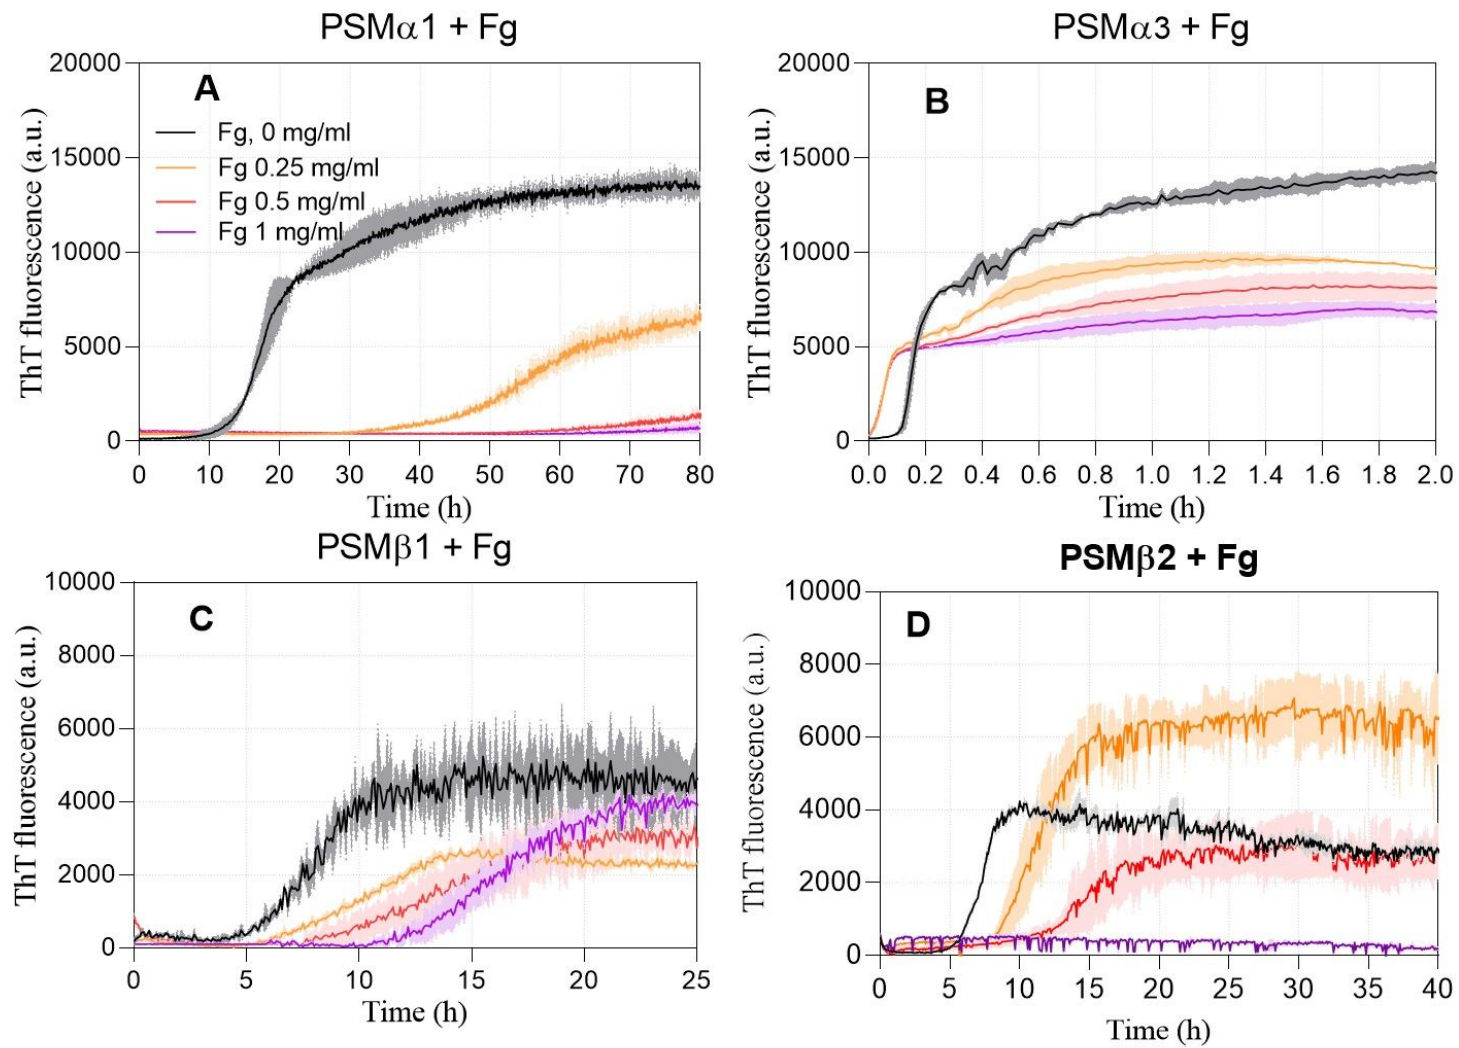

**Figure S1.** Kinetics of PSM amyloid formation in presence and absence of fibrinogen monitored by ThT fluorescence. A) PSM $\alpha$ 1, B) PSM $\alpha$ 3, C) PSM $\beta$ 1 and D) PSM $\beta$ 2. Colour codes from panel A also apply to panels B-D.

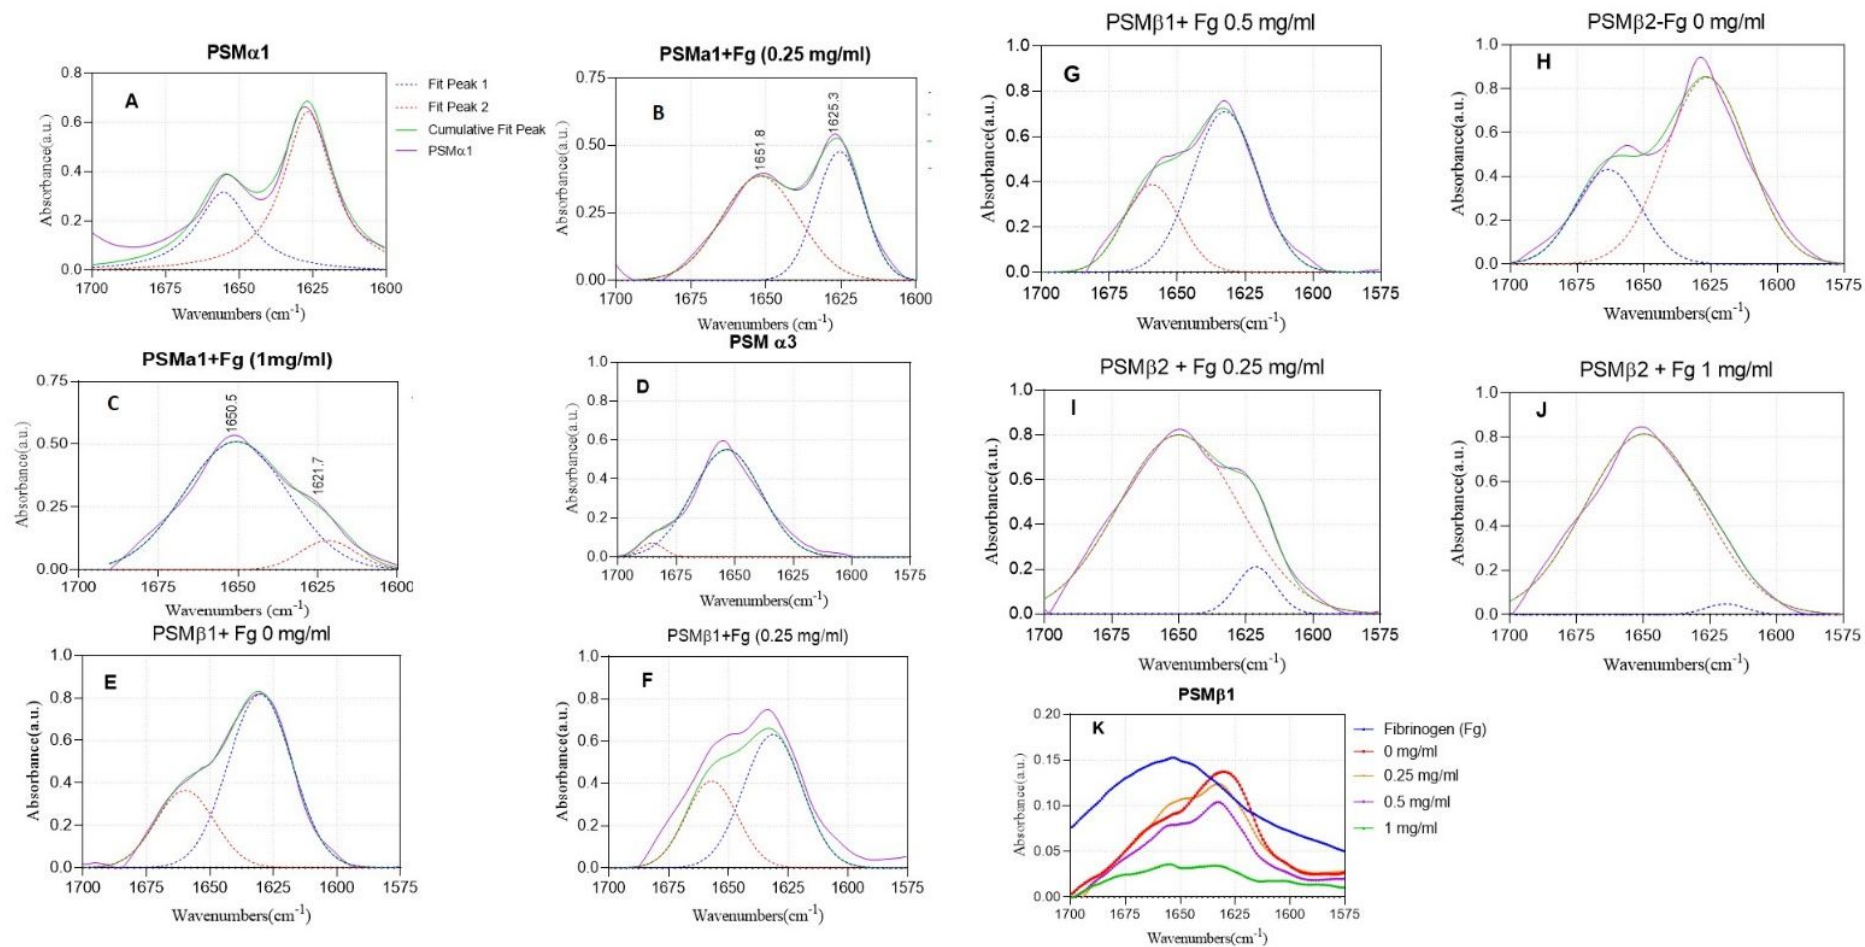

**Figure S2.** FTIR analysis of the secondary structure of PSMs peptides in presence of different concentrations of fibrinogen. Deconvolution of peaks carried out in Origin. A) PSM $\alpha$ 1 (0 mg/ml Fg), B) PSM $\alpha$ 1 (0.25 mg/ml Fg), C) PSM $\alpha$ 1 (1 mg/ml Fg) (D) PSM $\alpha$ 3 (0-1 mg/ml Fg), E) PSM $\beta$ 1 (0 mg/ml Fg), F) PSM $\beta$ 1 (0.25 mg/ml Fg), G) PSM $\beta$ 1 (0.5 mg/ml Fg) H) PSM $\beta$ 2 (0 mg/ml Fg), I) PSM $\beta$ 2 (0.25 mg/ml Fg), J) PSM $\beta$ 2 (1 mg/ml Fg). Colour code from panel A applies to panels B-J. K) FTIR curves of PSM $\beta$ 1(0.2 mg/ml) in presence of 0-1 mg/ml Fg.

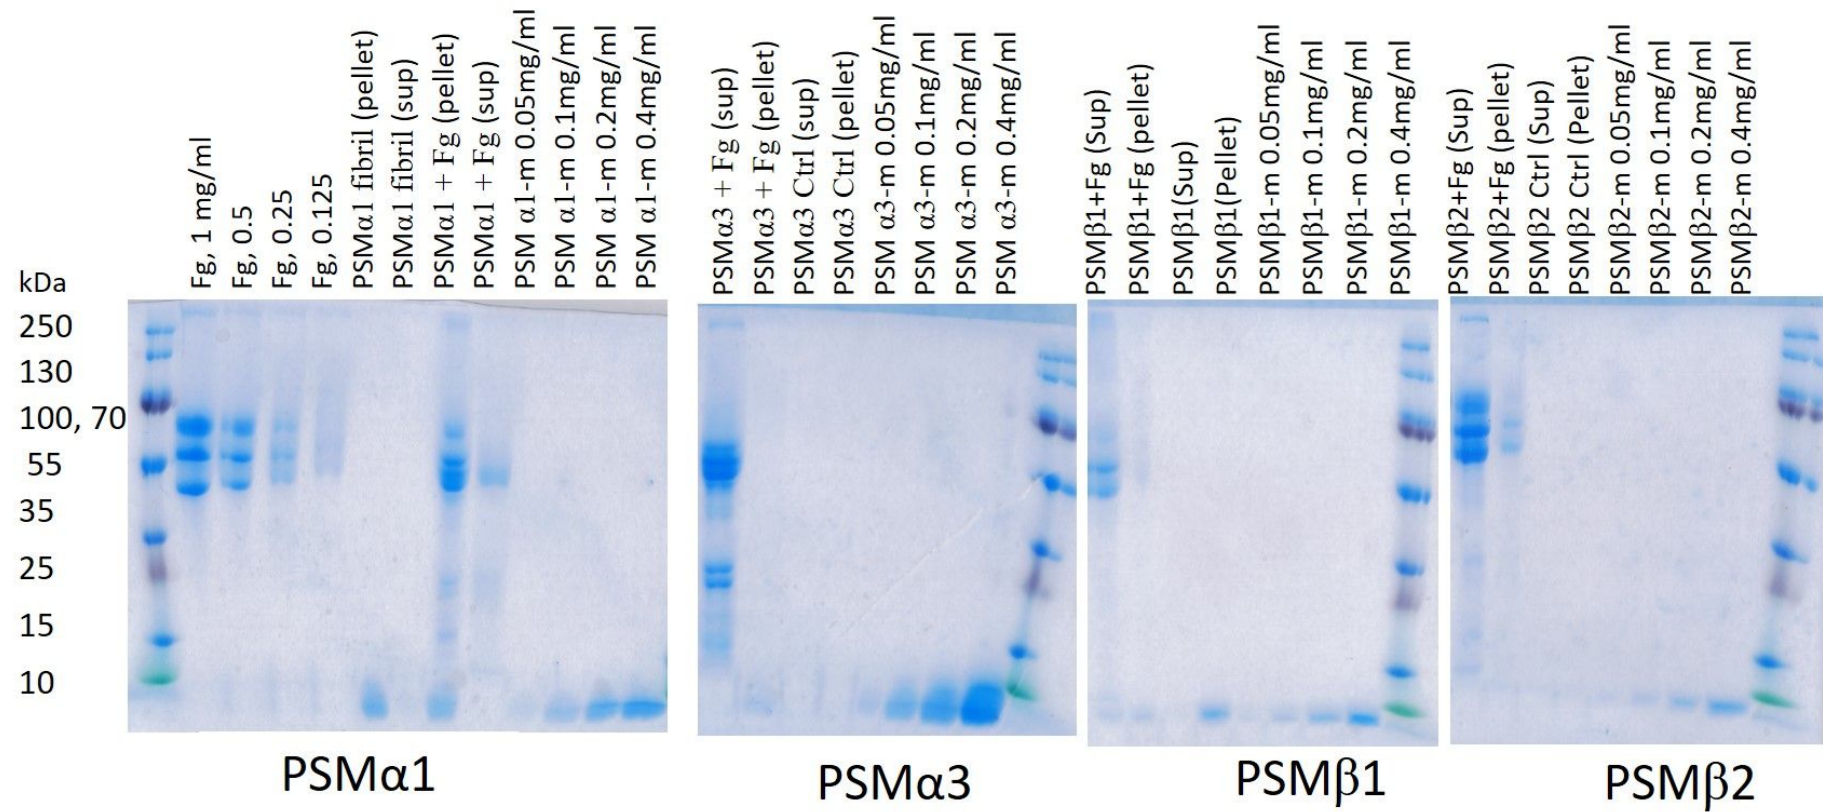

**Figure S3.** SDS-PAGE of pellet and supernatants of aggregates formed in presence of 1 mg/ml Fg densitometrically quantified using ImageJ.

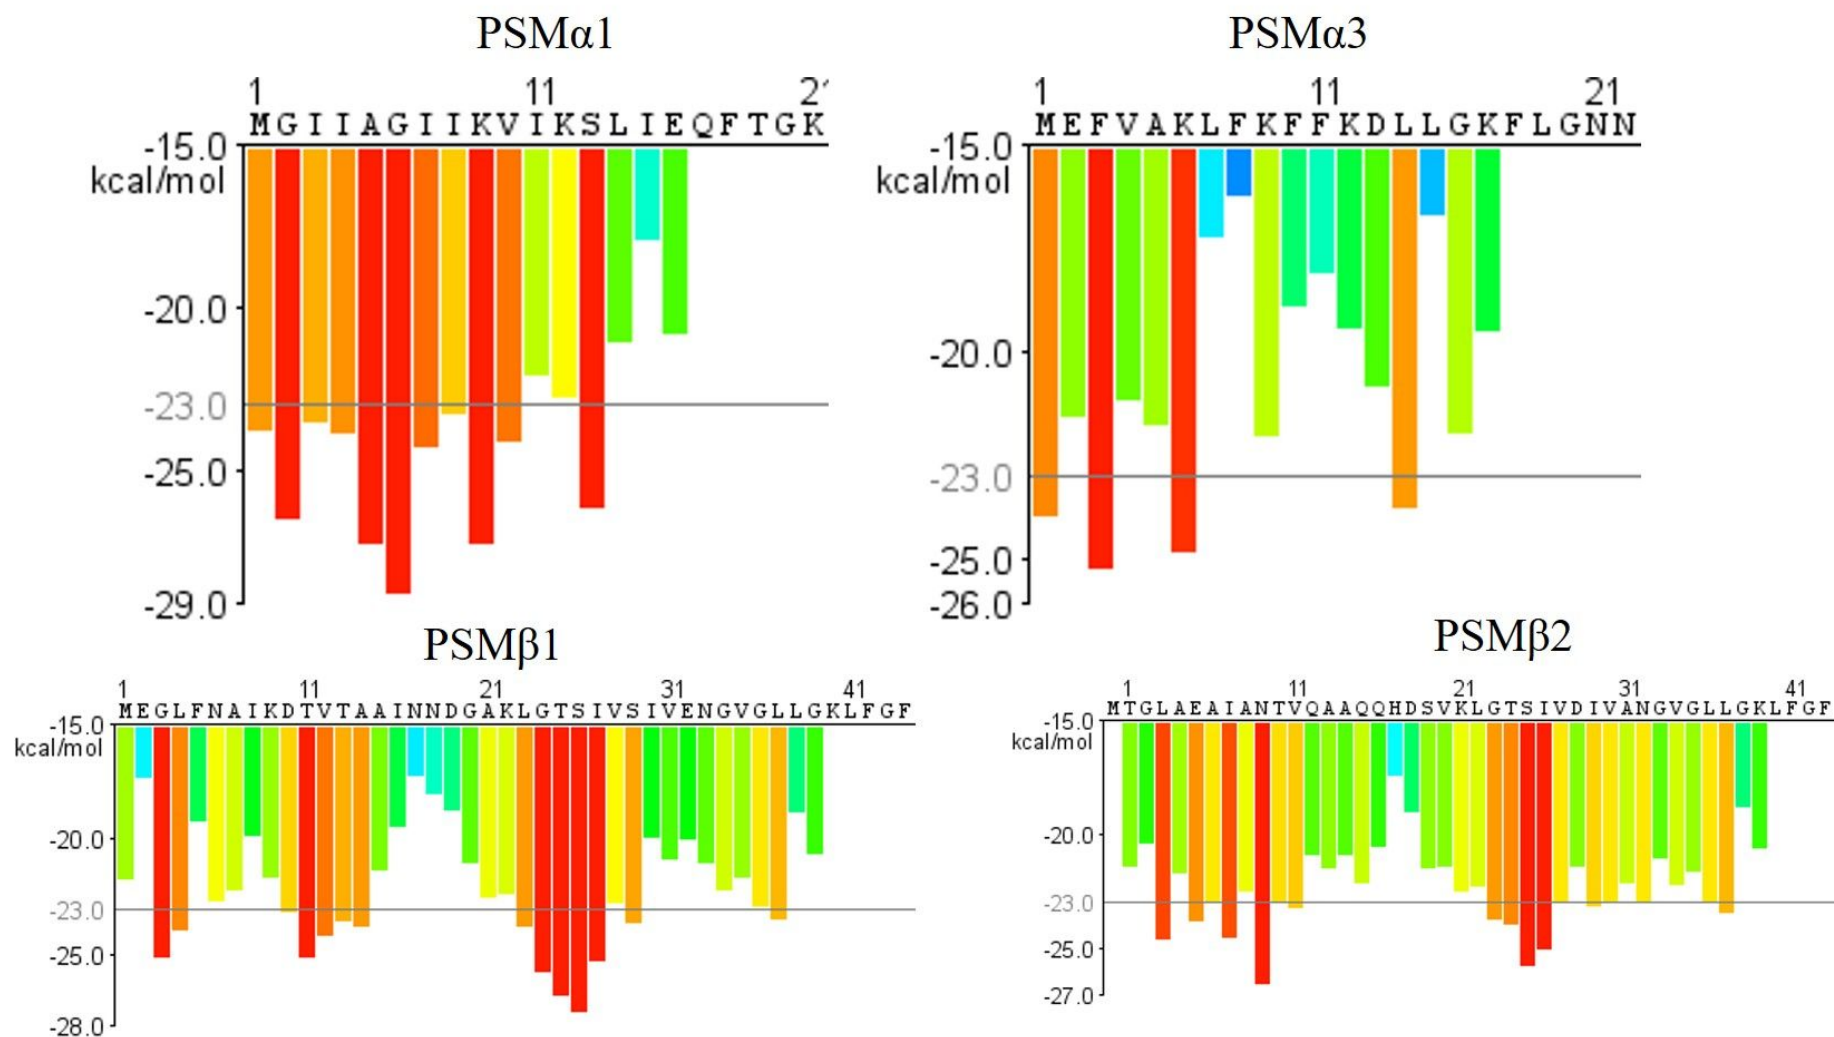

**Figure S4.** Computational prediction of aggregation propensity of different PSMs based on Rosetta energies that predict amyloid propensity in hexapeptides. Orange – red segments (energies < -23 kcal/mol) predicted to take part in fibril formation through higher aggregation propensity. Letters on x-axis denote the first residue of each hexapeptide.
